## Speaker-normalized vowel representations in the human auditory cortex

Matthias J. Sjerps<sup>1,2</sup>, Neal P. Fox<sup>3</sup>, Keith Johnson<sup>4</sup>, Edward F. Chang<sup>\*3,5,6</sup>

<sup>1</sup> Donders Institute for Brain, Cognition and Behaviour, Centre for Cognition, Radboud University, Nijmegen, The Netherlands

<sup>2</sup> Max Planck Institute for Psycholinguistics, Nijmegen, The Netherlands

<sup>3</sup> Department of Neurological Surgery, University of California, San Francisco, CA, USA

<sup>4</sup> Department of Linguistics, University of California, Berkeley, CA, USA

<sup>5</sup> Center for Integrative Neuroscience, University of California, San Francisco, CA, USA

<sup>6</sup> Department of Physiology, University of California, San Francisco

\*Corresponding author. Email: [edward.chang@ucsf.edu](mailto:edward.chang@ucsf.edu)

Short title: Speaker normalization in human cortex

1 **Abstract**

2           Humans identify speech sounds, the fundamental building blocks of spoken language,  
3 using the same cues, or acoustic dimensions, as those that differentiate the voices of different  
4 speakers. The correct interpretation of speech cues is hence uncertain, and requires  
5 normalizing to the specific speaker. Here we assess how the human brain uses speaker-related  
6 contextual information to constrain the processing of speech cues. Using high-density  
7 electrocorticography, we recorded local neural activity from the cortical surface of participants  
8 who were engaged in a speech sound identification task. The speech sounds were preceded by  
9 speech from different speakers whose voices differed along the same acoustic dimension that  
10 differentiated the target speech sounds (the first formant; the lowest resonance frequency of the  
11 vocal tract). We found that the same acoustic speech sound tokens were perceived differently,  
12 and evoked different neural responses in auditory cortex, when they were heard in the context  
13 of different speakers. Such normalization involved the rescaling of acoustic-phonetic  
14 representations of speech, demonstrating a form of recoding before the signal is mapped onto  
15 phonemes or higher level linguistic units. This process is the result of auditory cortex' sensitivity  
16 to the contrast between the dominant frequencies in speech sounds and those in their just  
17 preceding context. These findings provide important insights into the mechanistic  
18 implementation of normalization in human listeners. Moreover, they provide the first direct  
19 evidence of speaker-normalized speech sound representations in human parabelt auditory  
20 cortex, highlighting its critical role in resolving variability in sensory signals.

## 21 Introduction

22 A fundamental computational challenge faced by perceptual systems is the lack of a  
23 one-to-one mapping between highly variable sensory signals and the discrete, behaviorally  
24 relevant events they reflect[1,2]. A profound example of this problem exists in human speech  
25 perception, where the main cues to speech sound identity are the same as those to speaker  
26 identity[3–5].

27 For example, to distinguish a given speaker's /u/ from his or her /o/ (distinguishing “boot”  
28 from “boat”), listeners rely heavily on the vowel's first formant frequency (F1; the first vocal tract  
29 resonance) because it is lower for /u/ than for /o/[6]. However, people with long vocal tracts  
30 (typically tall male speakers) have overall lower resonance frequencies than those of speakers  
31 with shorter vocal tracts. Consequently, a tall person's production of the word “boat” and a short  
32 person's “boot” might be acoustically identical. Behavioral research has suggested that  
33 preceding context allows listeners to “tune-in” to the acoustic properties of a particular voice and  
34 *normalize* subsequent speech input[7–11]. The most well-known example of this effect is that a  
35 single acoustic token, ambiguous between /u/ and /o/, will be labelled as /o/ after a context  
36 sentence spoken by a tall-sounding person (low F1), but like /u/ after a context sentence spoken  
37 by a shorter-sounding person (high F1)[12].

38 The neurobiological foundations of context-based speaker normalization remain largely  
39 unknown. Neural activity in auditory cortex is sensitive to acoustic cues that are critical for both  
40 recognizing and discriminating phonemes[13–19] and different talkers[20–24]. For example,  
41 recent work has shown that speech sound representations in STG are closely related to the  
42 acoustic-phonetic features that define classes of speech sounds, like F1. Vowels with low F1  
43 frequencies (e.g., /u/, /i/) can be distinguished from vowels with relatively higher F1 frequencies  
44 (e.g., /o/, /æ/) based on local activity on STG[25]. A critical question that arises, then, is whether  
45 the feature-based representations in auditory cortex are normalized (i.e., feature rescaling), or  
46 whether they continue to closely reflect the veridical acoustic properties of the input.

47 To investigate the influence of context on auditory cortex speech sound representations,  
48 we recorded cortical local field potentials with subdurally implanted high density electrode arrays  
49 that covered the broader peri-sylvian language region in human participants while they listened  
50 to and identified vowel sounds presented in the context of sentences spoken by two different  
51 voices[14,26]. We found direct evidence of speaker-normalized neural representations of vowel  
52 sounds in parabelt auditory cortex, including superior and middle temporal gyri. Normalization  
53 was observed in populations that were selective for acoustic-phonetic (i.e., pre-phonemic)  
54 properties of the speech signal. These effects were at least partly driven by the contrastive  
55 relation between the F1 range in the context sentences and F1 values in the target vowels.  
56 More generally, the results demonstrate the critical role of human auditory cortex in integrating  
57 incoming sounds with surrounding acoustic context.

58

## 59 **Results**

60 We recorded neural activity directly from the cortical surface of five Spanish-speaking  
61 neurosurgical patients while they voluntarily participated in a speech sound identification task.  
62 They listened to Spanish sentences that ended in a (pseudoword) target, which they  
63 categorized as either “sufu” or “sofo” on each trial with a button press (Figure 1a, b). The  
64 sentence-final targets comprised a digitally synthesized six-step continuum morphing from an  
65 unambiguous *sufu* to an unambiguous *sofo*, with four intermediate tokens (*s?f?*, i.e., spanning a  
66 perceptually ambiguous range). On each trial, a pseudo-randomly selected target was preceded  
67 by a context sentence (*A veces se halla...*; “*At times she feels rather...*”). Two versions of this  
68 context sentence were synthesized, differing only in their mean F1 frequencies (Figure 1a, c;  
69 Figure S1), yielding two contexts that listeners perceive as consistent with two speakers: one  
70 with a long vocal tract (low F1; Speaker A) and one with a short vocal tract (high F1; Speaker  
71 B). Critically, F1 frequency is the primary acoustic dimension that distinguishes between the  
72 vowels /u/ and /o/ in natural speech (in both Spanish and English), as well as in our target

73 continuum (Figure 1a and Figure S1)[6]. Similar materials have previously been shown to  
 74 induce a reliable shift in the perception of an /u/ – /o/ continuum (a “normalization effect”) in  
 75 healthy Spanish-, English-, and Dutch-listeners[8].

76 As expected, participants’ perception of the target continuum was affected by the F1  
 77 range of the preceding sentence context (p < 0.002; Figure 1d). Specifically, participants were  
 78 more likely to identify tokens as *sofo* (the vowel category corresponding to higher F1 values)  
 79 after a low F1 voice (Speaker A) compared to the same target presented after a high F1 voice  
 80 (Speaker B). Hence, listeners’ perceptual boundary between the /u/ and /o/ vowel categories  
 81 shifted to more closely reflect the F1 range of the context speaker. Past work has interpreted  
 82 this classical finding in light of the contrastive perceptual effects that are ubiquitous among  
 83 sensory systems[27]: the F1 of a speech target will sound relatively higher (i.e., sound more like  
 84 an /o/) after a low F1 context sentence than after a high F1 context. This results in a shift of the  
 85 category boundary to lower F1 values.

86

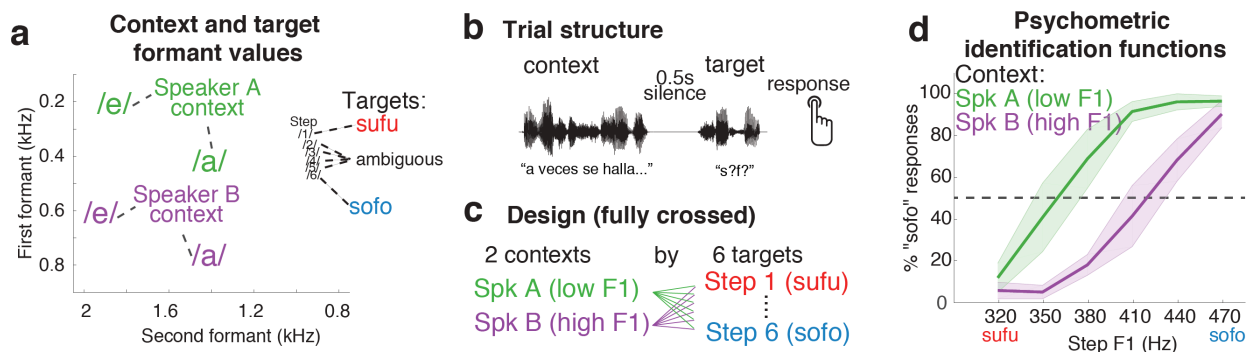

87

88 **Figure 1: Listeners perceive speech sounds relative to their acoustic context. a)** Target  
 89 sounds were synthesized to create a 6 step continuum ranging from /sufu/ (step 1; low first  
 90 formant [F1]) to /sofo/ (step 6; high F1). Context sentences were synthesized to sound like two  
 91 different speakers: a speaker with a long vocal tract (low F1 range: Speaker A), and a speaker  
 92 with a short vocal tract (high F1 range; Speaker B). Context sentences contained only the  
 93 vowels /e/ and /a/, but not the target vowels /u/ and /o/. Following phonetic convention, the

94 *formant axes are reversed (higher values at the bottom/left sides of the panel). b) Context*  
95 *sentences preceded the target on each trial (separated by 0.5 seconds of silence), after which*  
96 *participants responded with a button press to indicate whether they heard “sufu” or “sofo”. c) All*  
97 *targets were presented after both speaker contexts. d) Listeners more often gave “sofo”*  
98 *responses to target sounds if the preceding context was spoken by Speaker A (low F1) than*  
99 *Speaker B (high F1).*

100

101 **Human auditory cortex exhibits context-dependent speech sound representations.** Two of  
102 the most influential hypotheses explaining the phenomenon of speaker normalization posit that:  
103 1) contrast enhancing processes, operating at general auditory processing levels, change the  
104 representation of the input signal before it is mapped onto phonemes or higher level linguistic  
105 units[28–30]; 2) alternatively, it has been suggested that auditory processing of speech cues  
106 remains mostly faithful to the acoustics of the input signal, and normalization is a consequence  
107 of speaker-specific mapping of the veridical acoustics onto meaningful units (i.e., listeners have  
108 learned to associate an F1 of 400Hz to /u/-words for speakers, or vocal tract, that sound short,  
109 but to /o/-words for ones that sound taller)[9,31].

110 Past neurobiological work has demonstrated that neural populations in the parabelt  
111 auditory cortex are sensitive to acoustic-phonetic cues that distinguish classes of speech  
112 sounds, including vowels, and not to specific phonemes per se[25]. Hence, the primary goal of  
113 the current study was to examine whether the F1 range in preceding context sentences  
114 influence the representation of speech sounds in parabelt (nonprimary) auditory cortex in a  
115 normalizing way. We investigated whether the neural representation of vowel stimuli remains  
116 veridical (i.e., unaffected by context) or, alternatively, whether it becomes shifted towards the  
117 representation typical of /u/ in the context of a high F1 speaker, but towards /o/ in the context of  
118 a low F1 speaker. We first tested whether individual cortical sites that reliably differentiate  
119 between vowels (i.e., discriminate /u/ from /o/ in their neural response) would exhibit

120 normalization effects. A secondary goal of the current study was to confirm that the response  
121 profile of those cortical populations that display normalization was indeed acoustic-phonetic  
122 (i.e., pre-phonemic) in nature. We therefore assessed populations' responsiveness during the  
123 context sentences as well (context sentences did not contain the target phonemes /o/ and /u/  
124 but did traverse the same acoustic F1 region).

125 To this end, we extracted the stimulus-aligned analytic amplitude of the high-gamma  
126 band (70-150 Hz) of the local field potential at each temporal lobe electrode (n = 406 across  
127 patients; this number is used for all Bonferroni corrections below) during each trial. High-gamma  
128 activity is a spatially- and temporally-resolved neural signal that has been shown to reliably  
129 encode phonetic properties of speech sounds[25,32,33], and is correlated with local neuronal  
130 spiking[34–36]. We used general linear regression models to identify cortical patches involved in  
131 the representation of context and/or target acoustics. Specifically, we examined the extent to  
132 which high-gamma activity at each electrode depended on stimulus conditions during  
133 presentation of the context sentences (context window) or during presentation of the target  
134 (target window; see supplemental materials). The fully specified encoding models included  
135 numerical variables for the target vowel F1 (Steps 1-6) and context F1 (high vs. low), as well as  
136 their interaction. In the following, we focused on “task-related electrodes”, defined as the subset  
137 of temporal lobe electrodes for which a significant portion of the variance was explained by the  
138 full model, either during the target window or the during context window ( $p < 0.05$ ; uncorrected,  
139  $n = 98$ ; see Figure S2).

140 Among the task-related electrodes, some displayed selectivity to target vowel F1 (Figure  
141 2a). Consistent with previous reports of auditory cortex tuning for vowels[25] we observed that  
142 different subsets of electrodes displayed a preference for either “sufu” or “sofo” targets (color  
143 coded in Figure 2a). Figure 2b and Figure 2c (middle panel) display the response profile for one  
144 example electrode that had a “sofo” preference ( $e1$ ;  $p = 6.8 \cdot 10^{-19}$ ). Importantly, in addition to an  
145 overall selectivity to the target sound F1, the activation level of this electrode was modulated by

146 the F1 range of the *preceding* context (Figure 2b & bottom panel of Figure 2c;  $p = 5.8 \times 10^{-6}$ ). This  
147 demonstrates that the responsiveness of a neural population that is sensitive to bottom-up  
148 acoustic cues is also affected by the distribution of that cue in preceding context. The direction  
149 of this influence is analogous to the behavioral normalization effect.

150 To quantify this normalization effect across all electrodes that display selectivity to target  
151 acoustics, we calculated the correlation between electrodes' *target preference* (numerically  
152 defined as the glm-based signed t-statistic of the target F1 factor during the target window) and  
153 their *context effect* (defined as the t-statistic of the context F1 factor during the target window).  
154 We found a correlation between electrodes' target preferences and context effects (Figure 2d).  
155 Crucially, this strong relationship had a negative slope, such that electrodes that had high-F1  
156 target preferences (sofo > sufu) had stronger responses to targets after low F1 context  
157 sentences (low F1 context > high F1 context;  $r = -0.65$ ;  $p = 1.3 \times 10^{-6}$ ). Importantly, this  
158 demonstrates that the relationship between context response and target response reflects an  
159 encoding of the contrast between the formant properties of each, recapitulating the  
160 normalization pattern observed in the behavioral responses (Fig 1d).

161



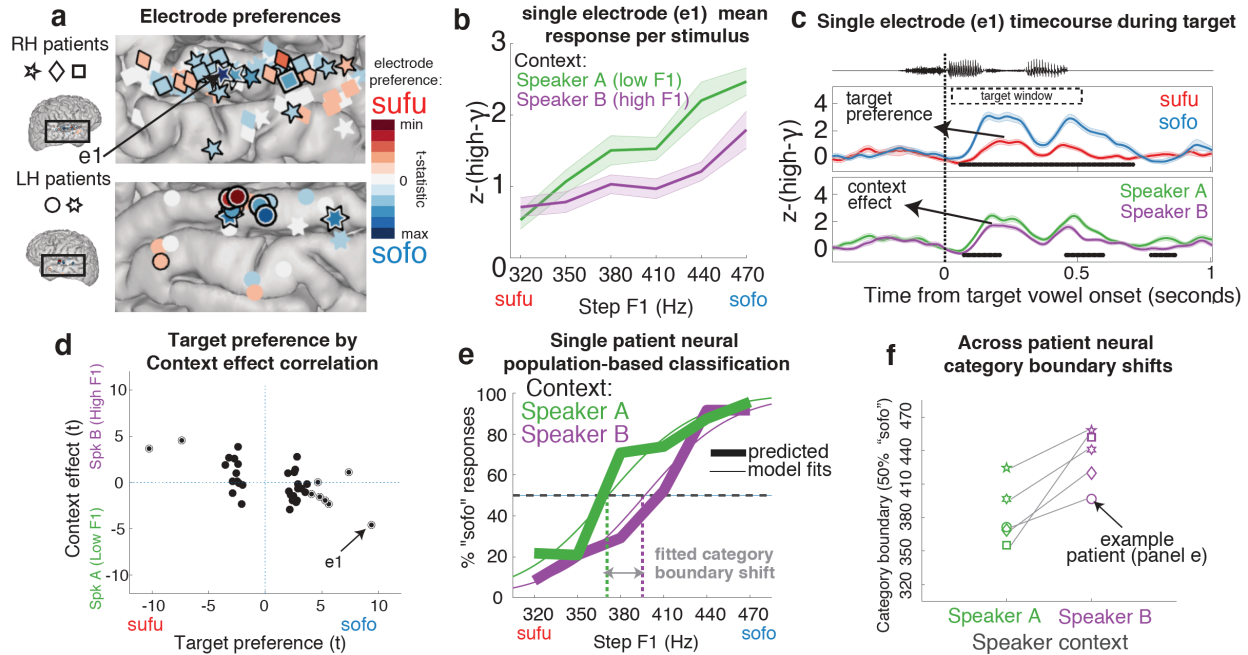

162

163

164

165

166

167

168

169

170

171

172

173

174

175

176

177

**Figure 2: The neural response to bottom-up acoustic input is modulated by preceding context.** **a)** Target vowel preferences and locations (plotted on an MNI brain) for electrodes from all patients (3 with right hemisphere [RH] and 2 with left hemisphere [LH] grid implants). Only those temporal lobe electrodes where the full omnibus model was significant during the context and/or the target window (F-test;  $p < 0.05$ ) are displayed. Strong target F1 selectivity is relatively uncommon: electrodes with a black-and-white outline are significant at Bonferroni corrected  $p < 0.05$  ( $n = 9$ , out of 406 temporal lobe electrodes); a single black outline indicates significance at only  $p < 0.05$ , uncorrected ( $n = 28$ ). Activity from the indicated electrode (e1) is shown in **b** and **c**. **b)** Example of normalization in a single electrode (e1; z-scored high-gamma [high- $\gamma$ ] response averaged across the target window [target window marked in **c**];  $\pm 1$  SE). **c)** Activity from e1 across time, separating the endpoint targets (top panel) or the contexts (bottom panel). The electrode responds more strongly to /o/ stimuli than /u/ stimuli, but also responds more strongly overall after Speaker A (low F1). This effect is analogous to the behavioral normalization (Fig. 1d). Black bars at the bottom of the panels indicate significant time-clusters (cluster-based permutation test of significance). **d)** Among all electrodes with significant target

178 *sound selectivity (n = 37 [9 + 28]), a relation exists between the by-electrode context effect and*  
179 *target preference. Both are expressed as a signed t-value, demonstrating that the size and*  
180 *direction of the target preferences predicts the size and direction of the context effects. As per a,*  
181 *symbol style reflects level of significance (solid back =  $p < 0.05$  uncorrected; black-and-white =*  
182  *$p < 0.05$  Bonferroni corrected). e) An LDA classifier was trained on the distributed neural*  
183 *responses elicited by the “sufu” and “sofo” stimuli using all endpoint selective electrodes of a*  
184 *patient. This model was then used to predict classes for (held-out) endpoint data and for the*  
185 *ambiguous steps. Proportions of neurally-based “sofo” predicted trials (thick lines) display a*  
186 *relative shift between the two context conditions (data from one example patient). Regression*  
187 *lines were fitted to these data for each participant separately to estimate 50% category*  
188 *boundaries per condition for panel f (thin lines). f) The neural classification functions display a*  
189 *shift in category boundaries between context conditions for all patients individually. Symbols*  
190 *denote individual participants.*

191

192 **Normalization of distributed vowel representations in all participants.** Figure 2d  
193 demonstrates that local populations in auditory cortex that are selective to target vowel F1  
194 exhibit normalization. However, only a few electrodes (n = 9, out of 406 temporal lobe  
195 electrodes) displayed very strong target vowel selectivity (significance at Bonferroni-corrected p  
196 <0.05), while the majority of target F1 selective electrodes displayed only moderate selectivity  
197 and context effects. Moreover, not all participants had such highly target F1 selective electrodes  
198 (see Table S2). The relative sparseness of strong selectivity is not surprising given that the  
199 target vowel synthesis involved only small F1 frequency differences (~30Hz) per step, with the  
200 endpoints being separated by only 150Hz (which is, however, a prototypical F1 distance  
201 between /u/ and /o/[8]). However, past work has demonstrated that even small acoustic  
202 differences among speech sounds are robustly encoded by distributed patterns of neural activity  
203 across auditory cortex[14,37]. In order to determine whether distributed neural representations

204 of vowels reliably display normalization across all participants, we trained a multivariate pattern  
205 classifier model (Linear Discriminant Analysis, LDA) on the spatiotemporal neural response  
206 patterns of each participant. Models were trained to discriminate between the endpoint stimuli  
207 (i.e., trained on the neural responses to steps 1 vs. 6, irrespective of context) using all task-  
208 related electrodes for that participant. These models were then used to predict labels for held-  
209 out data of both the endpoints and the ambiguous steps. For all participants, classification of  
210 held-out endpoint trials was significantly better than chance (Figure S3b). To assess the  
211 influence of target F1 and context F1 on the classifier output, a logistic generalized linear mixed  
212 model was then fit to the proportion of predicted “sofo” responses across all participants.

213 Figure 2e displays the proportion of “sofo” labels predicted for all stimuli by the LDA  
214 classifier based on the neural data of one example participant (thick lines). Importantly, a shift is  
215 observed in the point of crossing of the category boundary. Regression functions fitted to these  
216 data (thin lines) allowed us to estimate the size and direction of the context-driven neural  
217 boundary (50% crossover point) shift per participant. For all participants, the neural vowel  
218 boundaries were found to be context dependent (Figure 2f; see online methods and  
219 Supplementary Figure S3 for further detail). The combined regression analysis demonstrated  
220 that, across participants, population neural activity in the temporal lobe was modulated both by  
221 the acoustic properties of the target vowel ( $p = 1.2 \cdot 10^{-7}$ ) and by the preceding context ( $p =$   
222  $4.2 \cdot 10^{-8}$ ). This effect was not dependent on the approach to exclusively train on endpoint data  
223 (Figure S5). Moreover, this effect was not observed for task-related electrodes outside of the  
224 temporal lobe during the target window (see S4; non-temporal electrodes were mostly located  
225 on sensorimotor cortex and the inferior frontal gyrus).

226 Importantly, and in analogy to the behavioral results, the neural classification functions  
227 demonstrate that the influence of the context sentences consistently affected target vowel  
228 representations in a normalizing direction: the neural response of a target vowel with a given F1

229 is more like that of /o/ (high F1), after a low F1 context (Speaker A) than after a high F1 context  
230 (Speaker B; see Supplementary Figure S3 and S4b for more detail).

231

232 **Normalization as sensitivity to contrast in acoustic-phonetic features.** It has been  
233 suggested that a major organizing principle of human parabelt auditory cortex concerns the  
234 acoustic phonetic features that define classes of speech sounds, and not phonemes (or even  
235 higher level linguistic representations) per se[13,25,38]. Here we demonstrated normalization in  
236 these representations. However, auditory cortex processing is diverse and may contain regions  
237 that are in fact selective for (more abstract) phonemes. For example, auditory cortex has been  
238 found to display properties that are typically associated with abstract sound categories such as  
239 categorical perception, too[14]. Hence, we next assessed whether the normalization effects  
240 observed here involved a rescaling in patches of cortex that display sensitivity to acoustic-  
241 phonetic features (i.e., relating to more general F1 characteristics) or, instead, only in those  
242 patches that may be selective for discrete phonemes (or the target words as a whole). Because  
243 the context sentence did not contain the target vowels /u/ or /o/, but did traverse the same  
244 general F1 range, assessing electrodes' responses during the context window could inform us  
245 about the nature of their preferences.

246 To this end we again relied on the glm-based t-statistics of all target selective temporal  
247 lobe electrodes ( $n = 37$ ; as per Figure 2d). Among these electrodes, however, we examined the  
248 relationship between their preferences for context F1 during the context window and for target  
249 F1 during the target window. Figure 3a displays context and target preferences on the cortex of  
250 a single example patient. Among the electrodes that displayed target F1 selectivity, some also  
251 displayed selectivity for the context F1 during the context window (indicated with a black-and-  
252 white outline). Figure 3b displays the activation profile of one example electrode (e2).  
253 Importantly, e2 responds more strongly to low F1 targets during the target window (*sufu*  
254 preferent:  $p = 2.4 \cdot 10^{-21}$ ) but also to low F1 contexts during the context window (Speaker A

255 preferent:  $p = 1.7 \times 10^{-14}$ ). This demonstrates that this neural population responded more strongly  
 256 to low F1 acoustic stimuli in general and is not exclusively selective for a discrete phoneme  
 257 category. Importantly, e2 also displayed normalization, as its activity was affected by context F1  
 258 during the *target* window ( $p = 2.7 \times 10^{-4}$ ), and the direction of that context effect was consistent  
 259 with contrastive normalization (cf. Fig. 2d).

260 Extending this finding to the population of electrodes, we found a significant positive  
 261 correlation across all target-selective temporal lobe electrodes between an electrode's target  
 262 preference and its context preference ( $r = 0.64$ ;  $p = 1.42 \times 10^{-5}$ ; Figure 3c). Hence, neural  
 263 populations that are selective for target F1 in fact often displayed a more general preference to  
 264 specific F1 frequency ranges. Moreover, when restricting the test of normalization (assessed as  
 265 the correlation between target preferences and the context effect, as per Figure 2d) to those  
 266 electrodes that displayed significant selectivity for both target F1 and context F1, normalization  
 267 was again found (Figure S6). These findings confirm that normalization affects acoustic-  
 268 phonetic (i.e., pre-phonemic) representations of speech sounds in parabelt auditory cortex.

269

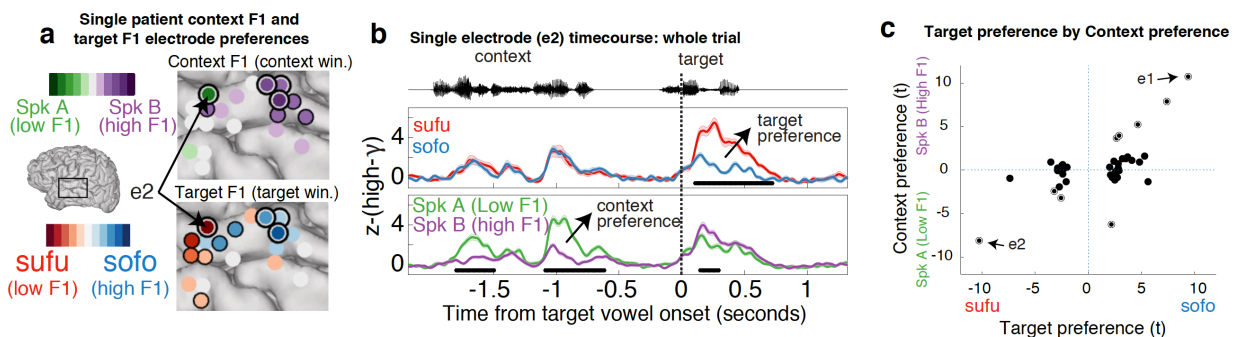

270

271 **Figure 3: Sensitivity to contrast in acoustic-phonetic features.** a) Electrode preferences for  
 272 both target F1 (during target window) and context F1 (during context window) from a single  
 273 example patient. Some populations display both target F1 selectivity and context F1 selectivity  
 274 (marked with a black-and-white outline), indicating a preference for higher or lower F1 frequency  
 275 ranges. Others are only selective for target F1 or context F1 (marked with a single black outline

276 *in their respective panels). Significance assessed at  $p < 0.05$  uncorrected. **b)** Mean ( $\pm 1$  SE)  
277 *high-gamma activity at an example electrode (e2) from the example patient in panel a*  
278 *(conditions split as described in Fig 2c). Activity is displayed for a time window encompassing*  
279 *the full trial duration (both precursor sentence and target word). Black bars represent significant*  
280 *time points ( $p < 0.05$ ; cluster-based permutation). **c)** A relation exists between the by-electrode*  
281 *context preference and target preference: electrodes that display a preference for either high or*  
282 *low target F1 typically also display a preference for the same F1 range during the context.**

283

## 284 **Discussion**

285 A critical challenge for human speech perception is the fact that different speakers  
286 produce the same speech sounds differently[1,3]. That is, speakers display different effective  
287 ranges with respect to their most informative speech cues (here, formants). We investigated the  
288 neural underpinnings of the behavioral finding that listeners rely on speaker-specific information  
289 to constrain phonetic processing. First, we observed behavioral normalization effects, replicating  
290 previous findings[7,8,10,11]. More importantly, analogous speaker-normalized representations  
291 of vowels were found in parabelt auditory cortex processing. These normalized representations  
292 were observed broadly across parabelt auditory cortex and were observed for all participants  
293 individually. Normalization was found to involve a context dependent change in the response  
294 strength of cortical populations that are selective for acoustic-phonetic features. These findings  
295 demonstrate that normalization is a highly robust phenomenon that results in a rescaling of  
296 representations that precede the mapping onto phonemes or higher level linguistic units.

297 Recent research has demonstrated that auditory cortex responds to the acoustic cues  
298 that are critical for both recognizing and discriminating phonemes[13–19] and different  
299 talkers[20–24] by means of different patterns of activation[37]. However, since cues that are  
300 critical for speaker and speech sound identification are conflated in the acoustic signal, these  
301 findings could be consistent either with a cortical representation of veridical acoustic properties

302 (e.g., reflecting the absolute F1 of a stimulus) or of context-dependent perceptual properties  
303 (e.g., its relative – or normalized – F1). Here, we were able to directly address the interaction  
304 between speaker and speech sound representations by presenting them to listeners at separate  
305 points in time and leveraging their immediate integration in auditory cortex processing. This  
306 approach demonstrated that rapid and broadly distributed normalization, or rescaling, is a basic  
307 principle of auditory cortex's encoding of speech sounds.

308         In behavioral research on normalization, the effect has often been discussed in relation  
309 to its contrastive nature. Indeed, we observed that a low F1 context led to more high F1 target  
310 percepts, which is consistent with an increase of perceptual contrast. Similar contrast enhancing  
311 operations have been widely documented in human and animal processing of various  
312 (nonspeech) acoustic stimuli[39–42], involving phenomena such as adaptive gain control[41] or  
313 stimulus specific adaptation[40,42]. An intuitive mechanism for the implementation of contrast  
314 enhancement involves sensory adaptation. This could be based on neuronal fatigue. When a  
315 neuron, or neuronal population, responds strongly to a masker stimulus, its response during a  
316 subsequent probe is often attenuated when the frequency of the probe falls within the neurons'  
317 excitatory receptive field[43,44]. But in addition to such local forms of adaptation, and possibly  
318 even more relevant for the effects observed here, adaptation also arises through (inhibitory)  
319 interactions between separate populations of neurons (which may have partly non-overlapping  
320 receptive fields)[39,41]. In the present study, spectral differences between the two context  
321 sentences and those between the endpoint target vowels were similar (see Figure S1).  
322 Adaptation may, hence, play a role in the type of normalization observed here. Indeed, we  
323 observed a number of populations for which a strong preference for one of the context  
324 sentences during the context window was associated with a decreased response during the  
325 target window (i.e., the normalization effect; Figure 3). Given the general nature of adaptation  
326 effects a relevant observation from the behavioral literature is the fact that various non-speech  
327 context sounds (e.g., broadband noise and musical tones) have also been observed to affect

328 the perception of speech sounds in a way that is at least qualitatively similar to those observed  
329 here[28,29,45]. This finding suggests that normalization effects may not be speech specific, and  
330 may, at least partly, be explained by adaptation effects.

331 An interesting additional question concerns the main locus of emergence of  
332 normalization. Broadly speaking, normalization could be inherited from primary auditory or  
333 subcortical processes (from which we were unable to record); it may largely emerge within  
334 parabelt auditory cortex processing itself; or it could be driven by top-down influences from  
335 regions outside of the auditory cortex. In our study, context and target sounds were separated in  
336 time by a 500ms silent interval. It has been suggested that adaptation effects over such longer  
337 latencies become especially dominant at cortical levels of processing[46,47]. Furthermore,  
338 behavioral experiments have demonstrated robust normalization effects with contralateral  
339 presentation of context and target sounds[28,45]. Both observations thus suggest that  
340 normalization can arise when the contribution of context effects that dominate peripheral  
341 auditory processing may be limited. With respect to the potential role of top-down modulations  
342 from regions outside of the auditory cortex, inferior frontal and sensorimotor cortex have been  
343 suggested to be involved in the resolving of perceptual ambiguities in speech perception[48,49]  
344 and could be expected to play a role in normalization too. Here we observed considerable  
345 activation in these regions, but they did not display normalization during the processing of the  
346 target sounds (see Figure S4). While tentative, these combined findings highlight the auditory  
347 cortex as the most likely locus for the emergence of normalization of speech sounds at this  
348 stage.

349 The current experiment involved data from cortical sites in both the left and right  
350 hemispheres. It has previously been demonstrated that the right hemisphere is more strongly  
351 involved in the processing of voice information[50,51]. Here, normalization was observed in left  
352 and right hemisphere patients (Figure 2f). Importantly, however, data included only two left



353 hemisphere and three right hemisphere patients in total, so no strong conclusions regarding  
354 lateralization can be drawn based on this dataset.

355         Despite broadly observed normalization of vowel representations, responses were not  
356 completely invariant to speaker differences during the context sentences (see for example the  
357 behavior of example electrode e2 in Figure 3b which displays a preference for the Low F1  
358 sentence though most of the context window: i.e., it is not fully normalized). And indeed, our  
359 (and previous[8,9,28]) findings show that, even for target sound processing, surrounding  
360 contexts never results in *complete* normalization. While the F1 in the context sentences differed  
361 by roughly 400 Hz, the normalization effect only induces a shift of ~50 Hz in the position of the  
362 category boundaries (in behavior and in neural categorization). Normalization should thus be  
363 seen as a mechanism that biases processing in a context-dependent direction, but not one that  
364 fully constrains processing. Furthermore, context-based normalization is not the only means by  
365 which listeners tune-in to specific speakers. Listeners categorize sound continua differently  
366 when they are merely told they are listening to a man or a woman, demonstrating the existence  
367 of normalization mechanisms that do not rely on acoustic context[52]. In addition, formant  
368 frequencies are perceived in relation to other formants and pitch values in the current signal,  
369 because those features are correlated within speakers (e.g., people with long vocal tracts  
370 typically have lower pitch and lower formant frequencies overall). These “intrinsic” normalization  
371 mechanisms have been shown to affect auditory cortex processing of vowels as well[53–57].  
372 Tuning-in to speakers in everyday listening is thus the result of the combination of at least these  
373 three distinct types of normalization[10].

374         To conclude, the results presented here reveal that the processing of vowels in auditory  
375 cortex becomes rapidly influenced by speaker-specific properties in preceding context. These  
376 findings add to recent literature that is ascribing a range of complex acoustic integration  
377 processes to the broader auditory cortex, suggesting that it participates in high-level encoding of  
378 speech sounds and auditory objects[14,25,58–60]. Recently, it has been demonstrated that

379 patches of parabelt auditory cortex represent speaker-invariant contours of intonation that  
380 speakers use to focus on one or the other part of a sentence[61]. The current findings build on  
381 these and demonstrate the emergence of speaker-normalized representations of acoustic-  
382 phonetic features and phonemes, the most fundamental building blocks of spoken language.  
383 This context-dependence allows auditory cortex to partly resolve the between-speaker variance  
384 present in speech signals. These features of auditory cortex processing underscore its critical  
385 role in our ability to understand speech in the complex and variable situations that we are  
386 exposed to every day.

387

## 388 **Materials and Methods**

389 **Patients.** A total of five human participants (2 male; all right handed; mean age 30.6 years), all  
390 native Spanish speaking (the US hospital at which participants were recruited has a  
391 considerable Spanish speaking patient population), were chronically implanted with high-density  
392 (256 electrodes; 4 mm pitch) multi-electrode cortical surface arrays as part of their clinical  
393 evaluation for epilepsy surgery. Arrays were implanted subdurally on the peri-Sylvian region of  
394 the lateral left (n = 2) or right (n = 3) hemispheres. Placement was determined by clinical  
395 indications only. All participants gave their written informed consent before the surgery, and had  
396 self-reported normal hearing. The study protocol was approved by the UC San Francisco  
397 Committee on Human Research. Electrode positions for reconstruction figures were extracted  
398 from tomography (CT) scans and co-registered with the patient's MRI.

399 **Stimulus synthesis.** Details of the synthesis procedure for these stimuli have been reported  
400 previously[8]. All synthesis was implemented in Praat software[62]. In brief, using source-filter  
401 separation, the formant tracks of multiple recordings of clear “sufu” and “sofo” were estimated.  
402 These estimates were used to calculate a single average time-varying formant track for both  
403 words, now representing an average of the formant properties over a number of instances of  
404 both [o] and [u]. The height of only the first formant of this filter model was increased and

405 decreased across the whole vowel to create the new formant models for the continuum from [u]  
406 to [o] covering the distance between endpoints in 6 steps. These formant tracks were combined  
407 with a model of the glottal-pulse source to synthesize the speech sound continuum. Synthesis  
408 parameters thus dictated that all steps were equal in pitch contour, amplitude contour and had  
409 identical contours for the formants higher than F1 (note that F1 and F2 values in Figure 1a and  
410 S1 reflect measurements of the resulting sounds, not synthesis parameters). The two context  
411 conditions were created through source-filter separation of a single spoken utterance of the  
412 sentence “a veces se halla” (“at times she feels rather...”). The first formant of the filter model  
413 was then increased or decreased by 100 Hz and recombined with the source model following  
414 similar procedures as for the targets.

415 **Procedures.** The participants were asked to categorize the last words of a stimulus as either  
416 “sufu” or “sofo”. Listeners responded using the two buttons on a button box. The two options  
417 "sufu" and "sofo" were always displayed on the computer screen. Each of the 6 steps of the  
418 continuum was presented in both the low- and high-F1 sentence conditions. Context conditions  
419 were presented in separate mini-blocks of 24 trials (6 steps \* 4 repetitions). Participants  
420 participated in as many blocks as they felt comfortable with.

421 **Data acquisition and preprocessing.** Cortical Local Field Potentials (LFPs) were recorded  
422 and amplified with a multichannel amplifier optically connected to a digital signal acquisition  
423 system (Tucker-Davis Technologies) sampling at 3,052 Hz. The stimuli were presented  
424 monaurally from loudspeakers at a comfortable level. The ambient audio (recorded with a  
425 microphone aimed at the participant) along with a direct audio signal of stimulus presentation  
426 were simultaneously recorded with the ECoG signals to allow for precise alignment and later  
427 inspection of the experimental situation. Line noise (60Hz and harmonics at 120 and 180 Hz)  
428 was removed from the ECoG signals with notch filters. Each time series was visually inspected  
429 for excessive noise, and trials and or channels with excessive noise or epileptiform activity were  
430 removed from further analysis. The remaining time series were common-average referenced

431 across rows of the 16x16 electrode grid. The time-varying analytic amplitude was extracted from  
432 eight bandpass filters (Gaussian, with logarithmically increasing center frequencies between  
433 70–150 Hz, and semi-logarithmically increasing bandwidths) with the Hilbert transform. High-  
434 gamma power was calculated by averaging the analytic amplitude across these eight bands.  
435 The signal was subsequently down-sampled to 100Hz. The signal was z-scored based on the  
436 mean and standard deviation of a baseline period (from -50 to 0 ms before the onset of the  
437 context sentence) on a trial by trial basis. In the main text, high- $\gamma$  will refer to this measure.  
438 **Single-electrode encoding analysis.** We used ordinary least-squares linear regression to  
439 predict neural activity (high- $\gamma$ ) from our stimulus conditions (target F1 steps, coded as -2.5, -1.5,  
440 -0.5, 0.5, 1.5, 2.5; and context F1, coded as -1 and 1; as well as their interaction). These factors  
441 were used as numerical predictors to neural activity that was averaged across the target window  
442 (from 70 to 570 ms after target vowel onset) or across the context window (from 250 to 1450 ms  
443 after context sentence onset –a later onset was chosen to reduce the influence of large and non-  
444 selective onset responses present in some electrodes-). For each model R-squared (Rsq)  
445 provides a measure of the proportion of variance in neural activity that is explained by the  
446 complete model. The p-value associated with the omnibus F-statistic provides a measure of  
447 significance. We set the significance threshold at  $\alpha = 0.05$  and corrected for multiple  
448 comparisons using the Bonferroni method, taking individual electrodes as independent samples.  
449 Figure S2a & b demonstrate that most of the variance in the context was explained by the factor  
450 context F1. During the target window however, both target F1 and context F1 explain a  
451 considerable portion of the variance. The interaction term was included to accommodate a  
452 situation where the context effect is more strongly expressed on one side of the target  
453 continuum than the other (see e.g., figure 2b, where the context effect is larger towards “sofo”),  
454 but is not further interpreted here.

455 For Figures 2d and Figure 3c, linear correlations between signed t-statistics of target F1  
456 preferences and context effects (Figure 2d) or context preferences (Figure 3c) were computed

457 over all significant (9 [corrected] + 28 [uncorrected] = 37) electrodes. For Figure S6a, linear  
458 correlations were computed separately for those electrodes that displayed significant selectivity  
459 for Target F1 and Context F1 ( $n = 9$ ; (marked with a black-and-white outline in S6a;  $r = -0.73$ ;  $p$   
460  $= 0.03$ ), and for electrodes that displayed selectivity to Target F1 only ( $n = 28$ ; S6a;  $r = -0.61$ ;  $p$   
461  $= 5.07 \cdot 10^{-4}$ ). For Figure S6b the same approach was applied for each high-gamma sample  
462 separately.

463 **Cluster-based permutation analyses.** For single example electrodes, a cluster-based  
464 permutations approach was used to assess significance of differences between two event  
465 related high gamma time courses (Figure 2c and Figure 3b; following the method described  
466 in[63]). For each permutation, labels of individual trials were randomly assigned to data (high- $\gamma$   
467 time courses), and a t-test was performed for each timepoint. Next, for each time point (across  
468 all 1000 permutations) a criterion value was established (the highest 95% of the [absolute] t-  
469 values for that timepoint). Then, for each permutation, it was established when its value reached  
470 above the criterion value and for how many samples it remained above criterion. A set of  
471 subsequent timepoints above criterion is defined as a cluster. Then, for each cluster the t-values  
472 were summed, and this value was assigned to that entire cluster. For each permutation only the  
473 largest (i.e., highest summed cluster value) was stored as a single value. This resulted in a  
474 distribution of maximally 1000 cluster values (some permutations may not result in any  
475 significant cluster and have a summed t-value of 0). Then, using the same procedure, the size  
476 of all potential clusters was established for the real data (correct assignment of labels), and it  
477 was established whether the size of each cluster was larger than 95% of the permutation-based  
478 cluster values.  $p < 0.001$  indicates that the observed cluster was larger than all permutation  
479 based clusters.

480 **Stimulus classification.** Linear Discriminant Analysis (LDA) models were trained to predict the  
481 stimulus from the neural population responses evoked by the stimuli. Per participant a single  
482 model was trained on all endpoint data, which was then used to predict labels for the ambiguous

483 items. To predict stimulus class for the endpoint stimuli (steps 1 and 6) a leave-one-out cross  
484 validation procedure was used to prevent overfitting. Model features (predictors) consisted of  
485 the selected timepoint\*electrode combinations per participant.

486 For the analyses (Figures 2; Figure S3; Figure S4) training data consisted of high-y data  
487 averaged across a 500ms time window starting 70ms after target vowel onset (the target vowel  
488 was the first point of acoustic divergence between targets).

489 In the analyses, all task-related electrodes for a given participant (and region-of-interest,  
490 see Figure S4) were selected. Trial numbers per participant are listed in Table S1. The analysis  
491 displayed in Figure 2 and Figures S3 and S4 hence relied on a large number of predictors  
492 (electrodes \* timepoints). While a large amount of predictors could result in overfitting, these  
493 parameters led to the highest proportion of correct classification for the endpoints (76% correct,  
494 see Figure S1b). High endpoint classification performance is important to establish the presence  
495 of normalization, but does not affect the extent of observed normalization, because the  
496 normalization effect is orthogonal. Importantly, in all analyses classification scores were only  
497 obtained from held-out data, preventing the fitting of idiosyncratic models. In addition, averaging  
498 across time (hence decreasing the number of predictors) led to qualitatively similar (and  
499 significant) effects for the important comparisons reported in this paper. Classification analyses  
500 resulted in a predicted class for each trial. These data were used as input for a generalized  
501 logistic linear mixed effects model.

502 **Generalized Linear Mixed effects regression of classification data (glmer).** For the  
503 analyses that assessed the effects of target stimulus F1 and context F1 on proportion of “sofo”  
504 responses (both behavioral and neural-classifier-based), the models had Target F1 (contrast  
505 coded, with the levels -2.5; -1.5; -0.5; 0.5; 1.5; 2.5) and Context F1 (levels -1; 1) entered as  
506 fixed effects, and uncorrelated by-patient slopes and intercepts for these factors as random  
507 effects.

508 For the analysis of the behavioral data, we observed more *sofo* responses towards the  
509 *sofo* end of the stimulus continuum ( $B_{\text{Target F1}} = 1.89$ ,  $z = 3.62$ ,  $p < 0.001$ ). Moreover, we  
510 observed an effect of context as items along the continuum were more often perceived as *sofo*  
511 (the vowel category corresponding to higher F1 values) after a low F1 voice (Speaker A) than  
512 after a high F1 voice (Speaker B) ( $B_{\text{Context F1}} = -1.71$ ,  $z = -3.15$ ,  $p = 0.002$ ).

513 For the analyses of neural representations the dependent variable consisted of the  
514 classes predicted by LDA stimulus classification described above. For the overall analysis  
515 including temporal lobe electrodes, the model revealed significant classification of the  
516 continuum ( $B_{\text{Target F1}} = 0.50$ ,  $z = 13.18$ ,  $p < 0.001$ ), suggesting reliable neural differences  
517 between the endpoints. Furthermore, an effect was also found for the factor Context on the  
518 proportion of “*sofo*” classifications ( $B_{\text{Context F1}} = -0.28$ ,  $z = -4.67$ ,  $p < 0.001$ ), reflecting the  
519 normalization effect of most interest. For the analysis focusing on the dorsal and frontal  
520 electrodes a significant effect of Step was observed, that is, significant classification of the  
521 continuum ( $B_{\text{Target F1}} = 0.20$ ,  $z = 6.04$ ,  $p < 0.001$ ), but no significant influence of context ( $B_{\text{Context F1}}$   
522  $= 0.02$ ,  $z = 0.31$ ,  $p = 0.76$ ) see S4C for further detail.

523 **Multidimensional scaling.** The neural dissimilarity between all 12 pairs of target items was  
524 measured by computing leave-one-out LDA classification scores between each target pair.  
525 Here, a high classification score reflects different neural representations, a low score reflects  
526 similarity. The resulting 12\*12 dissimilarity matrices were averaged across participants (Figure  
527 S5a). The across-participant average of the classification-based distance matrices was  
528 projected in Multidimensional Scaling space. The first (i.e., main) dimension reflected stimulus  
529 step (see Figure S5b), indicating that this is indeed the most dominant property of the selected  
530 electrode population. Importantly, this dimension also reflected normalization

531

532 **Author Contributions**

533 M.J.S. and K.J., conceived the study. M.J.S. designed the experiments, generated the stimuli  
534 and analyzed the data. M.J.S., N.F. and E.F.C. collected the data. M.J.S. and N.F. interpreted  
535 the data and wrote the manuscript. M.J.S., N.F., K.J., and E.F.C. edited the manuscript.

536

537 **Code availability.**

538 These results were generated using code written in Matlab. Code will be publicly available  
539 through the Open Science Framework [osf.io/u7xnp](https://osf.io/u7xnp).

540

541 **Data availability.**

542 The data that support the findings of this study will be publicly available through the Open  
543 Science Framework [osf.io/u7xnp](https://osf.io/u7xnp).

544

545 **Competing interests.**

546 The authors declare no competing interests.

547

548 **Acknowledgements.**

549 We are grateful to Matthew Leonard for commenting on an earlier version of this manuscript.

550 This work was supported by European Commission grant FP7-623072 (MJS); and NIH grants

551 F32-DC013486, R00-NS065120, DP2-OD00862, and R01-DC012379 (E.F.C.); and

552 F32DC015966 (N.P.F.).

553

554 **References**

- 555 1. Liberman AM, Cooper FS, Shankweiler DP, Studdert-Kennedy M. Perception of the  
556 speech code. *Psychol Rev.* 1967;74(6):431–61.
- 557 2. Diehl RL, Lotto AJ, Holt LL. Speech perception. *Annu Rev Psychol.* 2004;55:149–79.
- 558 3. Peterson GE, Barney HL. Control methods used in a study of the vowels. *Jounal Acoust*



- 559 Soc Am. 1952;24(2):175–84.
- 560 4. Newman RS, Clouse SA, Burnham JL. The perceptual consequences of within-talker  
561 variability in fricative production. *J Acoust Soc Am.* 2001;109(3):1181–96.
- 562 5. Chodroff E, Wilson C. Structure in talker-specific phonetic realization: Covariation of stop  
563 consonant VOT in American English. *J Phon.* 2017;61:30–47.
- 564 6. Ladefoged P, Johnson K. *A course in phonetics.* Nelson Education; 2014.
- 565 7. Ladefoged P, Broadbent DE. Information Conveyed by Vowels. *J Acoust Soc Am.*  
566 1957;29(1):98–104.
- 567 8. Sjerps MJ, Smiljanić R. Compensation for vocal tract characteristics across native and  
568 non-native languages. *J Phon.* 2013;41(3–4):145–55.
- 569 9. Johnson K. Speaker Normalization in Speech Perception. *Handb Speech Percept.*  
570 2005;(Figure 1):363–89.
- 571 10. Nearey TM. Static, dynamic, and relational properties in vowel perception. *J Acoust Soc*  
572 *Am.* 1989;85(5):2088–113.
- 573 11. Sjerps MJ, Zhang C, Peng G. Lexical Tone is Perceived Relative to Locally Surrounding  
574 Context, Vowel Quality to Preceding Context. *J Exp Psychol Hum Percept Perform.* 2017;
- 575 12. Ladefoged P. A note on “Information conveyed by vowels.” *J Acoust Soc Am.*  
576 1989;85(5):2223–4.
- 577 13. Creutzfeldt O, Ojemann GA, Lettich E. Neuronal activity in the human lateral temporal  
578 lobe: I. Responses to Speech. *Exp Brain Res.* 1989;77:451–75.
- 579 14. Chang EF, Rieger JW, Johnson K, Berger MS, Barbaro NM, Knight RT. Categorical  
580 speech representation in human superior temporal gyrus. *Nat Neurosci.* 2010 Nov  
581 3;13(11):1428–32.
- 582 15. Hickok G, Poeppel D. Neural basis of speech perception. *Hum Audit Syst Fundam Organ*  
583 *Clin Disord.* 2015;129:149–60.
- 584 16. Hickok G, Poeppel D. The cortical organization of speech processing. *Nat Rev Neurosci.*

- 585 2007;8(5):393–402.
- 586 17. Boatman D, Lesser RP, Gordon B. Auditory speech processing in the left temporal lobe:  
587 An electrical interference study. Vol. 51, *Brain and Language*. 1995. p. 269–90.
- 588 18. Scott SK, Johnsrude IS. The neuroanatomical and functional organization of speech  
589 perception. *Trends Neurosci*. 2003;26(2):100–7.
- 590 19. Steinschneider M, Nourski K V., Kawasaki H, Oya H, Brugge JF, Howard MA. Intracranial  
591 study of speech-elicited activity on the human posterolateral superior temporal gyrus.  
592 *Cereb Cortex*. 2011;21(10):2332–47.
- 593 20. Andics A, McQueen JM, Petersson KM. Mean-based neural coding of voices.  
594 *Neuroimage*. 2013;79:351–60.
- 595 21. Andics A, McQueen JM, Petersson KM, Gál V, Rudas G, Vidnyánszky Z. Neural  
596 mechanisms for voice recognition. *Neuroimage*. 2010;52(4):1528–40.
- 597 22. Belin P, Zatorre RJ, Lafaille P, Ahad P, Pike B. Voice-selective areas in human auditory  
598 cortex. *Nature*. 2000;403(6767):309–12.
- 599 23. Kriegstein K von, Kleinschmidt A, Sterzer P, Giraud A-L. Interaction of Face and Voice  
600 Areas during Speaker Recognition. *J Cogn Neurosci*. 2005;17(3):367–76.
- 601 24. Von Kriegstein K, Giraud AL. Distinct functional substrates along the right superior  
602 temporal sulcus for the processing of voices. *Neuroimage*. 2004;22(2):948–55.
- 603 25. Mesgarani N, Cheung C, Johnson K, Chang EF. Phonetic Feature Encoding in Human  
604 Superior Temporal Gyrus. *Science (80- )*. 2014;343(6174):1006–10.
- 605 26. Pasley BN, David S V., Mesgarani N, Flinker A, Shamma SA, Crone NE, et al.  
606 Reconstructing Speech from Human Auditory Cortex. *PLoS Biol*. 2012;10(1):e1001251.
- 607 27. Kluender KR, Coady JA, Kieffe M. Sensitivity to change in perception of speech. *Speech*  
608 *Commun*. 2003;41(1):59–69.
- 609 28. Watkins AJ. Central, auditory mechanisms of perceptual compensation for spectral-  
610 envelope distortion. *J Acoust Soc Am*. 1991;90(6):2942–55.

- 611 29. Stilp CE, Alexander JM, Kieft M, Kluender KR. Auditory color constancy: Calibration to  
612 reliable spectral properties across nonspeech context and targets. *Atten Percept*  
613 *Psychophys.* 2010;72(2):470–80.
- 614 30. Sjerps MJ, Mitterer H, McQueen JM. Hemispheric differences in the effects of context on  
615 vowel perception. *Brain Lang.* 2012;120(3).
- 616 31. Goldinger SD. Echoes of Echoes? An Episodic Theory of Lexical Access. *Psychol Rev.*  
617 1998;105(2):251–79.
- 618 32. Leonard MK, Chang EF. Dynamic speech representations in the human temporal lobe.  
619 *Trends Cogn Sci.* 2014;18(9):472–9.
- 620 33. Nourski K V., Steinschneider M, Rhone AE, Oya H, Kawasaki H, Howard MA, et al.  
621 Sound identification in human auditory cortex: Differential contribution of local field  
622 potentials and high gamma power as revealed by direct intracranial recordings. *Brain*  
623 *Lang.* 2015;148:37–50.
- 624 34. Steinschneider M, Fishman YI, Arezzo JC. Spectrotemporal analysis of evoked and  
625 induced electroencephalographic responses in primary auditory cortex (A1) of the awake  
626 monkey. *Cereb Cortex.* 2008;18(3):610–25.
- 627 35. Ray S, Maunsell JHR. Different origins of gamma rhythm and high-gamma activity in  
628 macaque visual cortex. *PLoS Biol.* 2011;9(4).
- 629 36. Crone N, Crone N, Boatman D, Boatman D, Gordon B, Gordon B, et al. Induced  
630 electrocorticographic gamma activity during auditory perception. *Clin Neurophysiol.*  
631 2001;112:565–82.
- 632 37. Formisano E, De Martino F, Bonte M, Goebel R. “Who” Is Saying “What”? Brain-Based  
633 Decoding of Human Voice and Speech. *Science (80- ).* 2008;322(5903):970–3.
- 634 38. Chan AM, Dykstra AR, Jayaram V, Leonard MK, Travis KE, Gygi B, et al. Speech-specific  
635 tuning of neurons in human superior temporal gyrus. *Cereb Cortex.* 2014;24(10):2679–  
636 93.

- 637 39. Brosch M, Schreiner CE. Time course of forward masking tuning curves in cat primary  
638 auditory cortex. *J Neurophysiol.* 1997;77(2):923–43.
- 639 40. Ulanovsky N, Las L, Farkas D, Nelken I. Multiple Time Scales of Adaptation in Auditory  
640 Cortex Neurons. *J Neurosci.* 2004 Nov 17;24(46):10440–53.
- 641 41. Rabinowitz NC, Willmore BDB, Schnupp JWH, King AJ. Contrast Gain Control in Auditory  
642 Cortex. *Neuron.* 2011;70(6):1178–91.
- 643 42. Pérez-González D, Malmierca MS. Adaptation in the auditory system: an overview. *Front*  
644 *Integr Neurosci.* 2014;8(February):1–10.
- 645 43. Harris DM, Dallos P. Forward masking of auditory nerve fiber responses. *J Neurophysiol.*  
646 1979;42(4):1083–107.
- 647 44. Smith RL. Short-term adaptation in single auditory nerve fibers: some poststimulatory  
648 effects. *J Neurophysiol.* 1977;40(5):1098–111.
- 649 45. Sjerps MJ, Mitterer H, McQueen JM. Hemispheric differences in the effects of context on  
650 vowel perception. *Brain Lang.* 2012;120(3):401–5.
- 651 46. Phillips EAK, Schreiner CE, Hasenstaub AR. Cortical Interneurons Differentially Regulate  
652 the Effects of Acoustic Context. *Cell Rep.* 2017;20(4):771–8.
- 653 47. Fitzpatrick DC, Kuwada S, Kim DO, Parham K, Batra R. Responses of neurons to click-  
654 pairs as simulated echoes: auditory nerve to auditory cortex. *J Acoust Soc Am.*  
655 1999;106(6):3460–72.
- 656 48. Pulvermuller F, Huss M, Kherif F, Moscoso del Prado Martin F, Hauk O, Shtyrov Y. Motor  
657 cortex maps articulatory features of speech sounds. *Proc Natl Acad Sci.*  
658 2006;103(20):7865–70.
- 659 49. Wilson SM, Iacoboni M. Neural responses to non-native phonemes varying in  
660 producibility: Evidence for the sensorimotor nature of speech perception. *Neuroimage.*  
661 2006;33(1):316–25.
- 662 50. Myers EB, Theodore RM. Voice-sensitive brain networks encode talker-specific phonetic

- 663 detail. *Brain Lang.* 2017;165:33–44.
- 664 51. Belin P, Zatorre RJ. Adaptation to speaker 's voice in right anterior temporal lobe.  
665 *Neuroreport.* 2003;14(16):2105–9.
- 666 52. Johnson K, Strand EA, D'Imperio M. Auditory-visual integration of talker gender in vowel  
667 perception. *J Phon.* 1999;27(4):359–84.
- 668 53. Edmonds BA, James RE, Utev A, Vestergaard MD, Patterson RD, Krumbholz K.  
669 Evidence for early specialized processing of speech formant information in anterior and  
670 posterior human auditory cortex. *Eur J Neurosci.* 2010;32(4):684–92.
- 671 54. Andermann M, Patterson RD, Vogt C, Winterstetter L, Rupp A. Neuromagnetic correlates  
672 of voice pitch, vowel type, and speaker size in auditory cortex. *Neuroimage.*  
673 2017;158(February):79–89.
- 674 55. Monahan PJ, Idsardi WJ. Auditory sensitivity to formant ratios: Toward an account of  
675 vowel normalisation. *Lang Cogn Process.* 2010;25(6):808–39.
- 676 56. Kreitewolf J, Gaudrain E, von Kriegstein K. A neural mechanism for recognizing speech  
677 spoken by different speakers. *Neuroimage.* 2014;91:375–85.
- 678 57. von Kriegstein K, Smith DRR, Patterson RD, Kiebel SJ, Griffiths TD. How the Human  
679 Brain Recognizes Speech in the Context of Changing Speakers. *J Neurosci.*  
680 2010;30(2):629–38.
- 681 58. Engineer CT, Perez C a, Chen YH, Carraway RS, Reed AC, Shetake J a, et al. Cortical  
682 activity patterns predict speech discrimination ability. *Nat Neurosci.* 2008 May [cited 2013  
683 Mar 7];11(5):603–8.
- 684 59. Leonard MK, Baud MO, Sjerps MJ, Chang EF. Perceptual restoration of masked speech  
685 in human cortex. *Nat Commun.* 2016;7:13619.
- 686 60. Bizley JK, Walker KMM, Nodal FR, King AJ, Schnupp JWH. Auditory cortex represents  
687 both pitch judgments and the corresponding acoustic cues. *Curr Biol.* 2013;23(7):620–5.
- 688 61. Tang C, Hamilton LS, Chang EF. Intonational speech prosody encoding in the human

- 689 auditory cortex. *Science*. 2017;357(6353):797–801.
- 690 62. Boersma P, Weenink D. Praat: Doing phonetics by computer (Version 5.1). 2009.
- 691 63. Maris E, Oostenveld R. Nonparametric statistical testing of EEG- and MEG-data. *J*
- 692 *Neurosci Methods*. 2007;164(1):177–90.
- 693
- 694
- 695
- 696

697 **Supporting information:**

698 S1:

**a Stimuli first formant tracks**

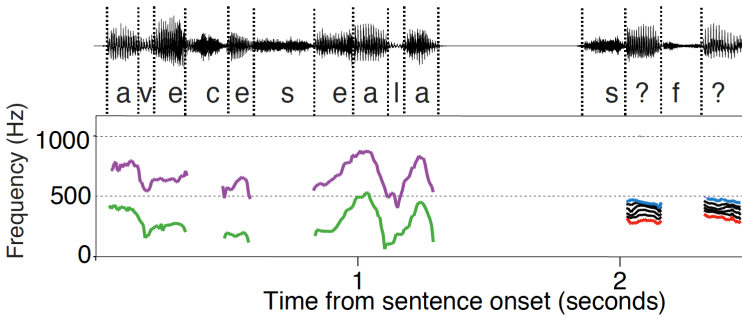

**b Stimuli power spectra**

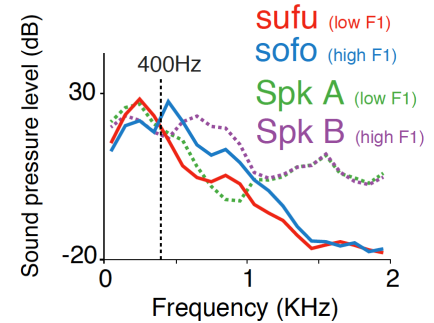

699

700 **Figure S1: Contexts and targets display similar spectral differences.** *a) First formant tracks*  
701 *for the voiced portions of the synthesized materials. In the annotation “?” indicates one of the*  
702 *target vowel steps. b) A similar spectral relation exists between the two endpoint targets /u/ vs.*  
703 */o/ and the context sentences. /u/ and the low F1 speaker have more dominant low frequency*  
704 *components (i.e., below 400 Hz) in the spectrum than /o/ and the High F1 speaker.*

705

706

707 S2:

**a Proportions of variance explained per electrode**

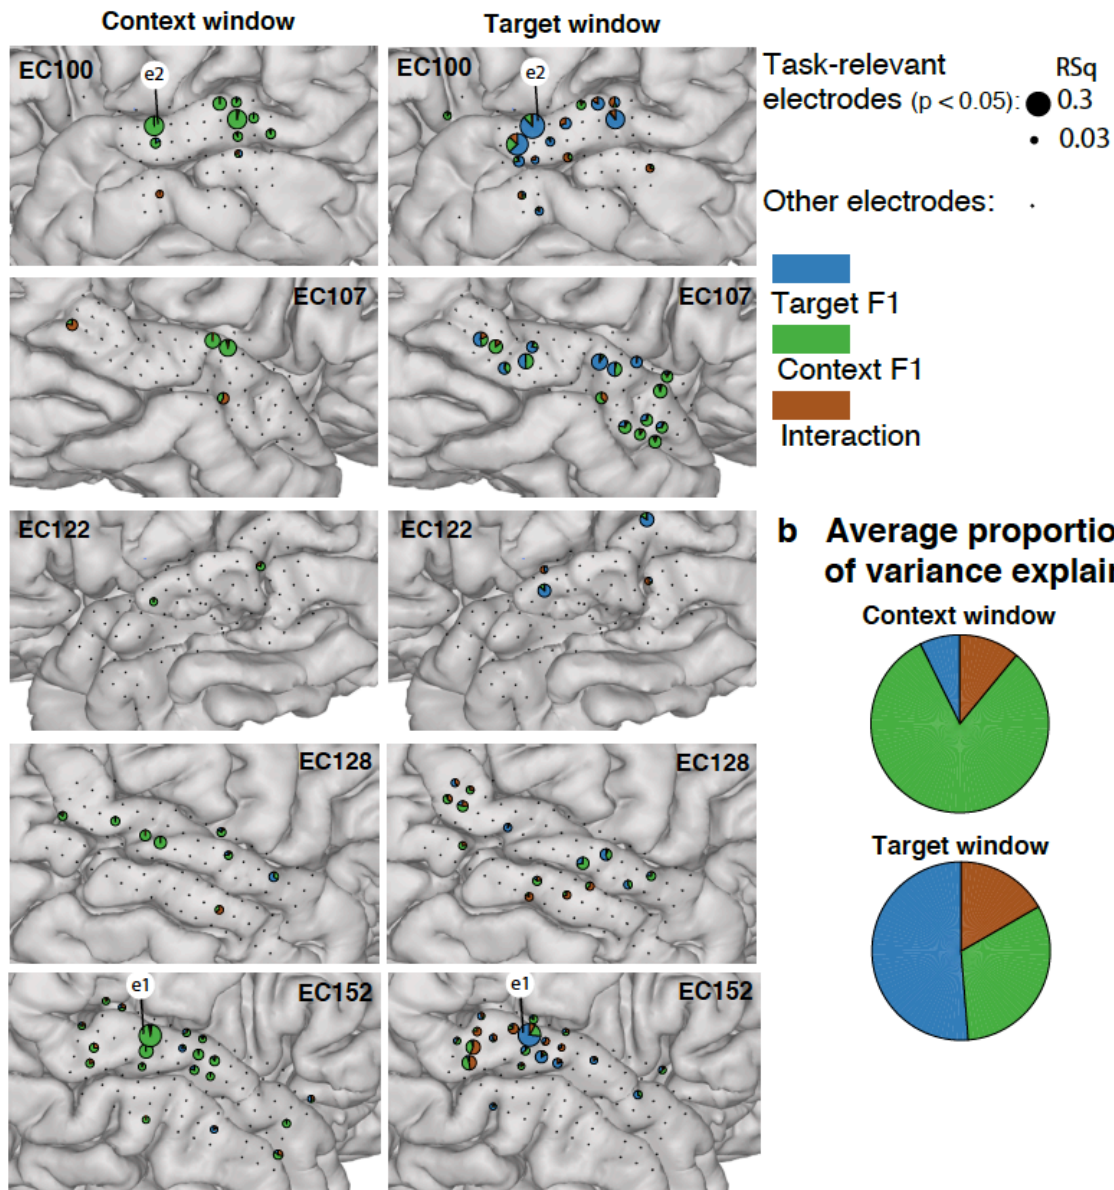

708

709 *Figure S2: Context F1 influences cortical activity during target processing. a) Map of*  
710 *context and target encoding for all task-related electrodes of all subjects (temporal lobe only),*  
711 *both during the context window (left column) and during the target window (right column). The*  
712 *areas of the pie-charts are proportional to the total variance explained. Wedges show the*  
713 *relative variance explained by each factor (stimulus dimension) for each significant electrode. b)*



714 *Weighted average proportion of variance explained by main effects and interactions across all*  
715 *significant electrodes (across all 5 patients). During the context window, context properties*  
716 *explain the large majority of variance. During the target window, the context stimulus properties*  
717 *still explain a considerable portion of the variance.*  
718

719 S3:

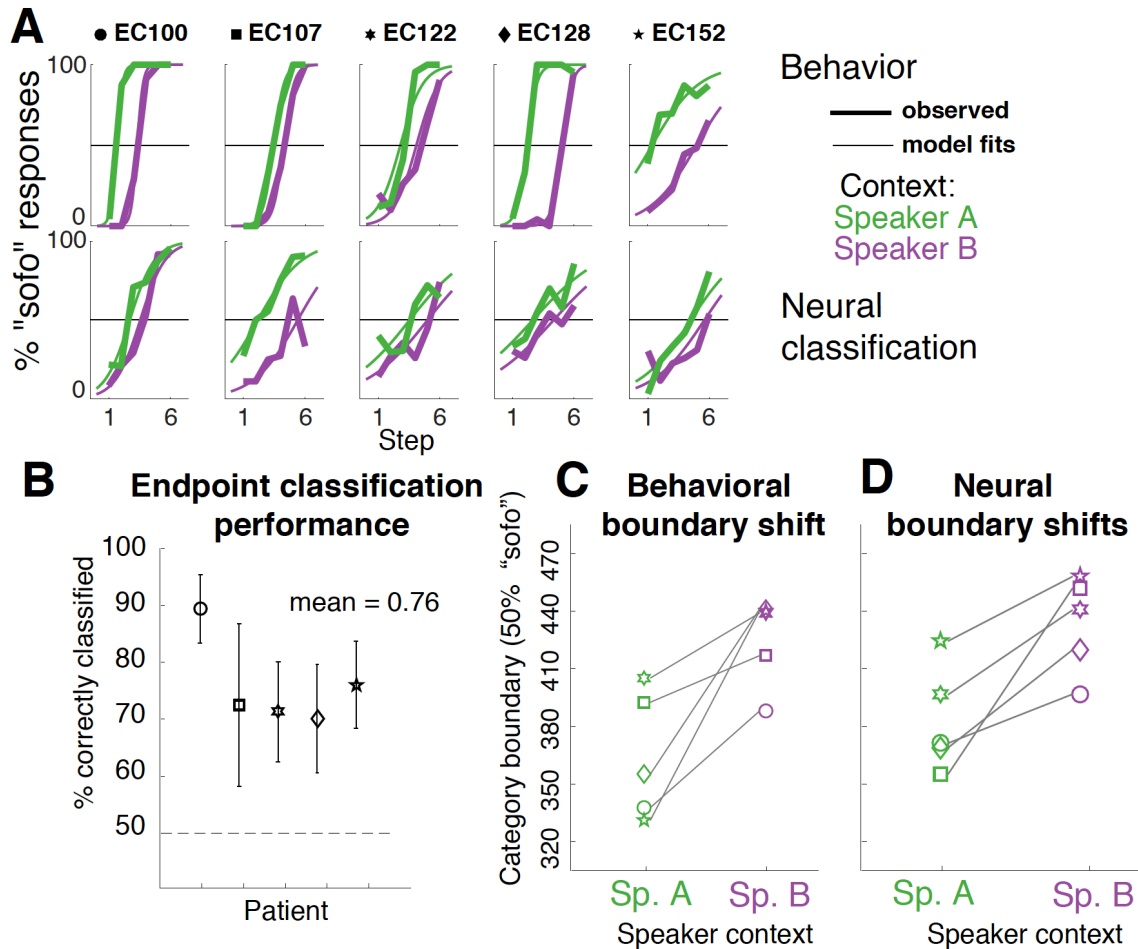

720

721 **Figure S3: All participants display context effects in both their behavior and neural**

722 **responses.** a) Top row: Observed mean proportions of "sofo" responses across the steps of the

723 continuum in both context conditions for all participants (thick lines). Model fits (thin lines) are

724 used to estimate the 50% category boundary per condition per participant (used for panel c).

725 Bottom: same as in top panel but for the neural classification data (thick lines reflect LDA-based

726 predictions). b) overall percentage correct (leave-one-out) classification on the endpoints per

727 participant (with bootstrapped 95% CI). c) By-participant indications of the estimated 50%

728 category boundaries in the two context conditions based on behavior. d) same as c but for 50%

729 category boundary estimates of the neurally-based classification (i.e., identical to Figure 2d, but

730 reproduced for comparison to Fig. S3c).

731 S4:

732

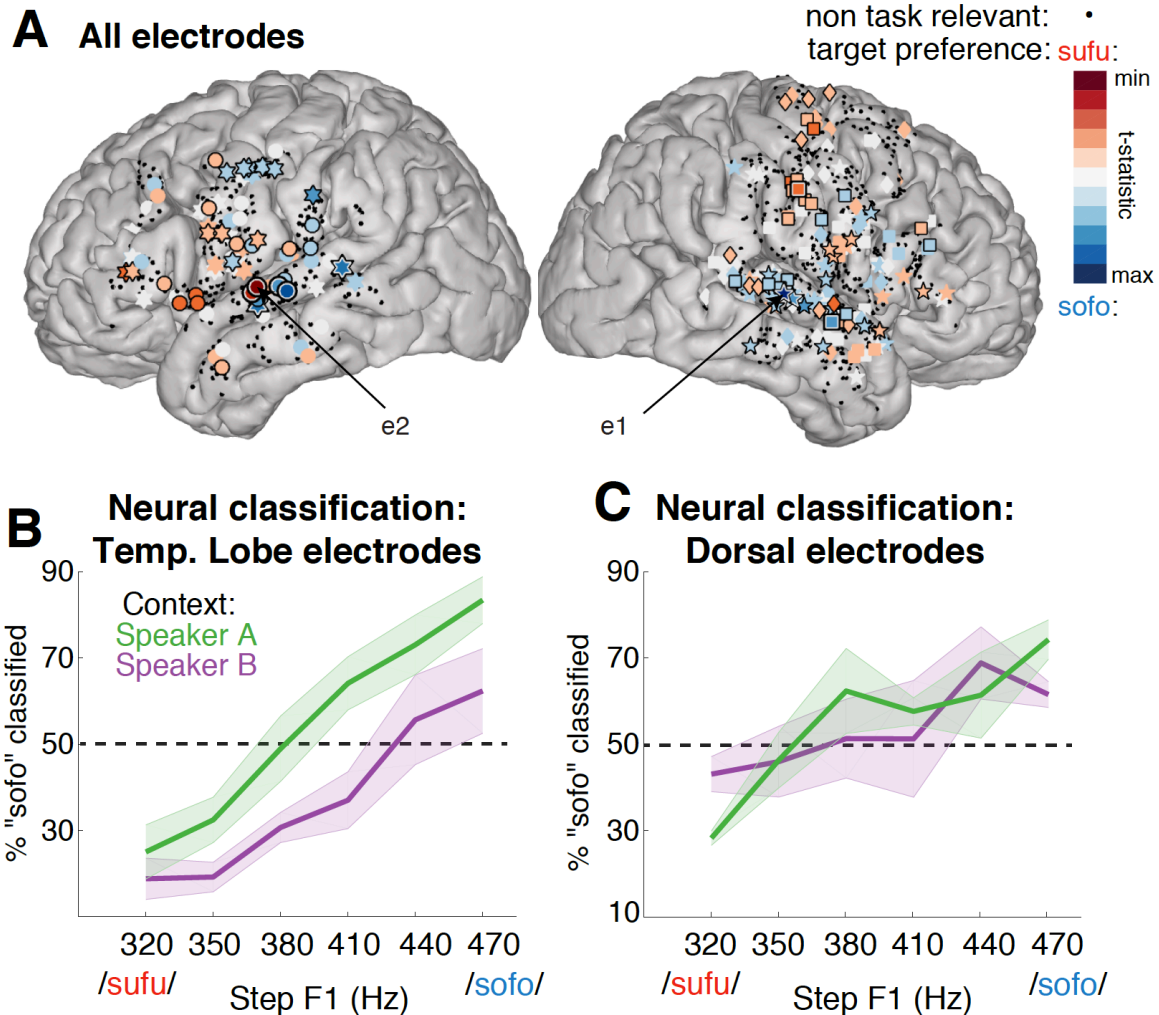

733

734 **Figure S4: Normalization is observed only in temporal lobe regions** a) Target vowel  
735 selective electrodes are congregated on the temporal lobe, although some are also found in  
736 frontal regions. b) when including temporal electrodes, LDA classification results (averaged  
737 across participants) reveal a strong context effect. c) no context effect is observed for LDA  
738 classification results based on electrodes from dorsal (i.e., all non-temporal) regions.

739

740

741

742 S5:

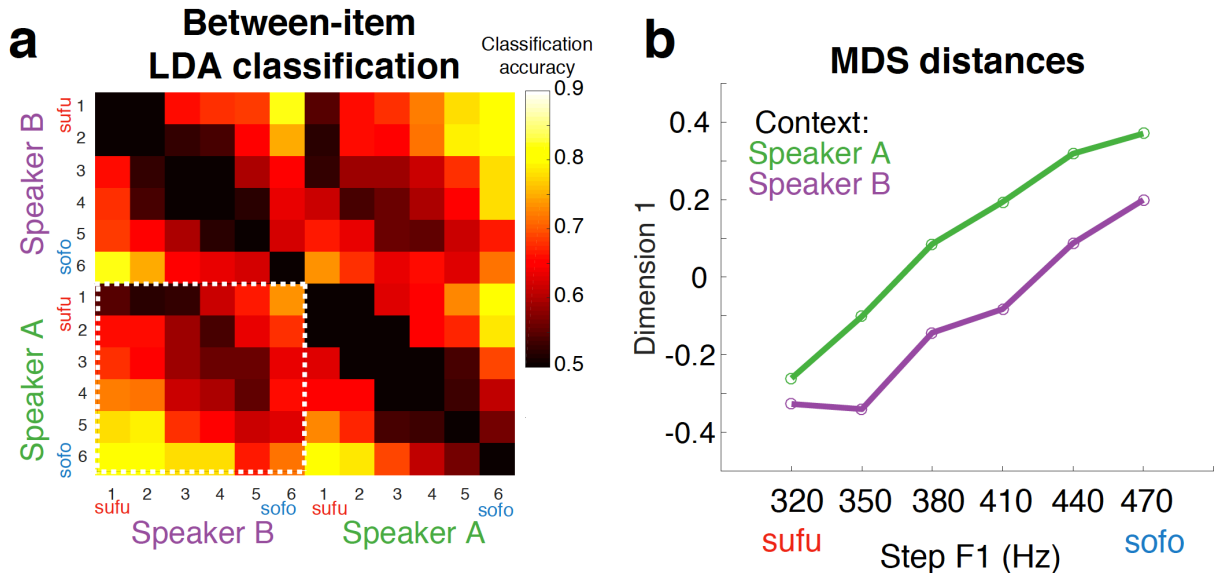

743

744 *Figure S5: **Between stimulus neural distances reflect normalization** a) Distance matrix*  
745 *based on between-stimulus leave-one-out LDA classification of a two-class classifier. High*  
746 *classification performance reflects large neural distances. The lower left corner (involving the*  
747 *between-context comparisons; marked with a white-dashed outline) demonstrates*  
748 *normalization: e.g., step 2 of Speaker A is most similar to step 4 of Speaker B, etc. Under*  
749 *veridical processing, smallest distances would follow the sub-diagonal (with the smallest*  
750 *distances for the comparisons of 1 vs. 1; 2 vs. 2; etc.) b) Multidimensional scaling (MDS) based*  
751 *on the distance matrix (in a) reveals that target stimulus F1 is the main factor (D1) determining*  
752 *neural dissimilarity. Critically, this dimension is also influenced by context F1. That is, it reflects*  
753 *normalization.*

754

755 S6

756

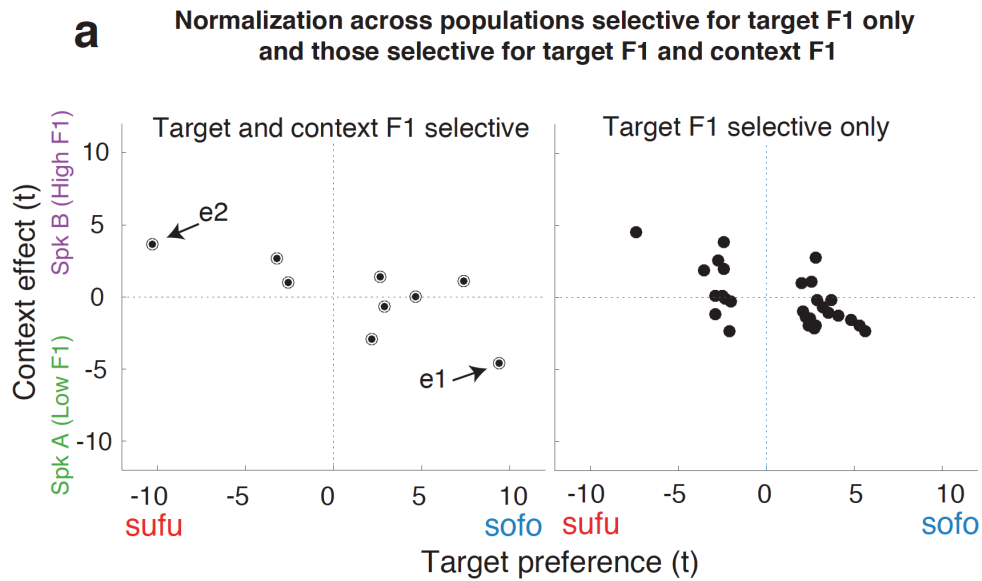

757

758 **Figure S6: Normalization across target F1 selective population types.** Panels displays the  
759 same relation as Figure 2d, (the relation between target preference and context effect; i.e.,  
760 normalization), but for two types of populations. Normalization is observed for electrodes that  
761 are most clearly selective for acoustic-phonetic features (instead of phonemes) since they  
762 display preferences for both target F1 and context F1 (left panel; black-and-white outline; target  
763 and context materials contain different phonemes). For completeness; normalization is also  
764 observed for those electrodes that display target F1 preferences only (right panel; black fill). See  
765 Figure 3 for reference.

766 **SUPPLEMENTARY TABLES**

767

768 **S1: Trial counts**

| 769 | Item   | EC100 | EC107 | EC122 | EC128 | EC152 |
|-----|--------|-------|-------|-------|-------|-------|
| 770 | High_1 | 24    | 9     | 28    | 23    | 33    |
| 771 | High_2 | 24    | 9     | 26    | 23    | 26    |
| 772 | High_3 | 24    | 12    | 31    | 24    | 31    |
| 773 | High_4 | 23    | 11    | 27    | 24    | 27    |
| 774 | High_5 | 24    | 11    | 29    | 19    | 29    |
| 775 | High_6 | 24    | 9     | 27    | 22    | 26    |
| 776 | Low_1  | 23    | 11    | 25    | 21    | 31    |
| 777 | Low_2  | 24    | 12    | 27    | 21    | 29    |
| 778 | Low_3  | 24    | 9     | 23    | 20    | 33    |
| 779 | Low_4  | 23    | 8     | 30    | 20    | 31    |
| 780 | Low_5  | 24    | 10    | 25    | 19    | 31    |
| 781 | Low_6  | 23    | 11    | 28    | 21    | 31    |

782

783

784 **S2: Electrode type counts (temporal lobe)**

| 785 | Patient | Task-related | Target F1(corrected) | Context F1(corrected) |
|-----|---------|--------------|----------------------|-----------------------|
| 786 | <hr/>   |              |                      |                       |
| 787 | EC100   | 21           | 10(4)                | 8(3)                  |
| 788 | EC107   | 19           | 7(1)                 | 4(2)                  |
| 789 | EC122   | 6            | 3(2)                 | 3(0)                  |
| 790 | EC128   | 20           | 6(0)                 | 10(2)                 |
| 791 | EC152   | 32           | 11(2)                | 16(4)                 |
